# Supplementary material for: Contrasting biscryptand/dimethyl paraquat [3]pseudorotaxanes: statistical vs. anticooperative complexation behavior
Source: Royal Society of Chemistry journal article supplement (doi:10.1039/c1ob06299a), 2011-01-01
Supplement: c1ob06299a.pdf [file c1ob06299a.pdf]

# Contrasting Biscryptand/Dimethyl Paraquat [3]Pseudorotaxanes: Statistical vs. Anticooperative Complexation Behavior

Zhenbin Niu, Harry. W. Gibson\*

Department of Chemistry, Virginia Polytechnic Institute and State University, Blacksburg,  
Virginia, 24061

E-mail [hwgibson@vt.edu](mailto:hwgibson@vt.edu)

## Contents

|                                                                              |    |
|------------------------------------------------------------------------------|----|
| 1. <i>Materials and methods</i> .....                                        | S2 |
| 2. <i>Determination of <math>\Delta_0</math> for 1-DMP<sub>2</sub></i> ..... | S2 |
| 3. <i>Determination of <math>\Delta_0</math> for 2-DMP<sub>2</sub></i> ..... | S3 |
| 4. <i>Mass spectrum of 1-DMP<sub>2</sub></i> .....                           | S3 |
| 5. <i>Mass spectrum of 2-DMP<sub>2</sub></i> .....                           | S4 |

### 1. Materials and methods

The bis(*meta*-phenylene)-32-crown-10 (BMP32C10) cryptands **1** and **2**<sup>S1</sup> and guest **DMP**<sup>S2</sup> were prepared according to literature procedures. Solvents were either used as purchased or dried according to literature procedures. <sup>1</sup>H-NMR spectra were obtained on a JEOL ECLIPSE-500 spectrometer with internal standard TMS. <sup>13</sup>C-NMR spectra were collected on a JEOL ECLIPSE-500 spectrometer at 125 MHz. MS were obtained by employing a Hewlett Packard MSD GCMS.

10

### 2. Determination of $\Delta_0$ for **1**·**DMP**<sub>2</sub>

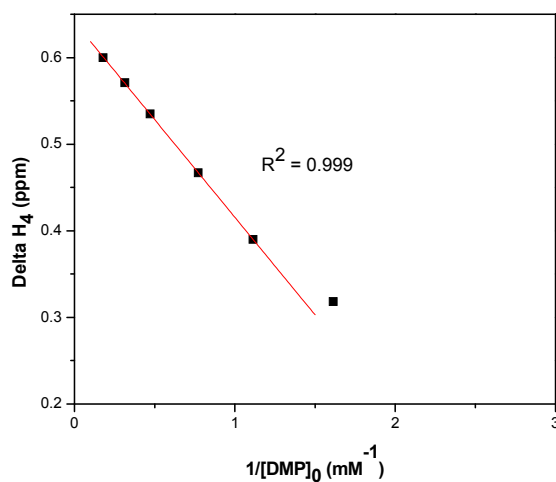

**Figure S1.** Determination of  $\Delta_0$  of **1**·**DMP**<sub>2</sub> in CDCl<sub>3</sub>/(CD<sub>3</sub>)<sub>2</sub>CO = 1/3 <v/v>. [**1**]<sub>0</sub> = 0.34 mM.  $\Delta_0 = 0.631$  ppm.

### 3. Determination of $\Delta_0$ of $2 \cdot \text{DMP}_2$

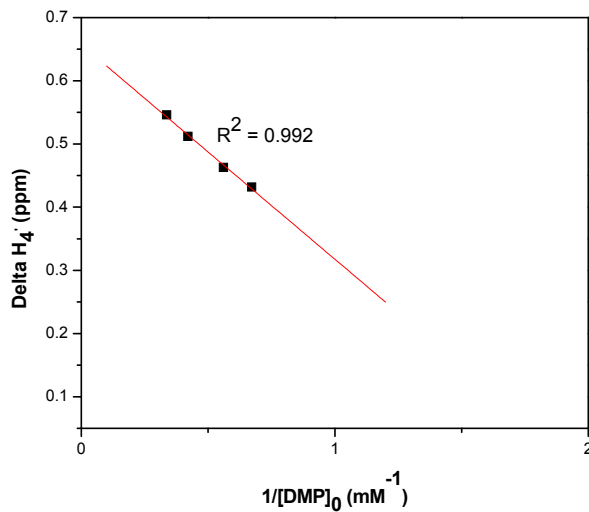

**Figure S2.** Determination of  $\Delta_0$  of  $2 \cdot \text{DMP}_2$  in  $\text{CDCl}_3/(\text{CD}_3)_2\text{CO} = 1/3$   $\langle v/v \rangle$ .  $[\mathbf{2}]_0 = 0.34$  mM.  $\Delta_0 = 0.657$  ppm.

### 4. Mass spectrum of $1 \cdot \text{DMP}_2$

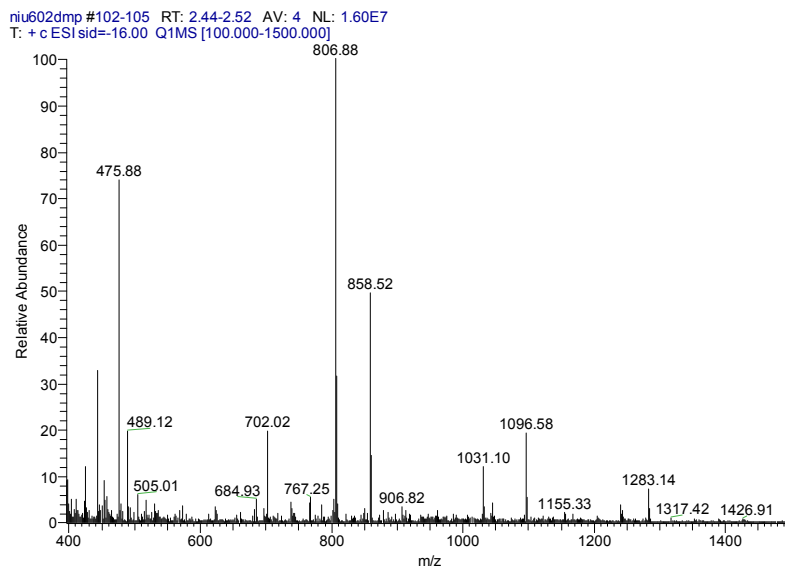

**Figure S3.** Electrospray ionization mass spectrum of  $1 \cdot \text{DMP}_2$ .

## 5. Mass spectrum of 2·DMP<sub>2</sub>

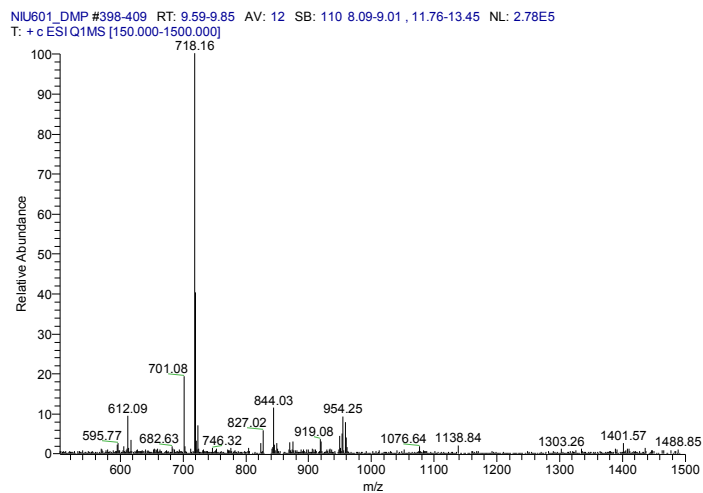

Figure S4. Electrospray ionization mass spectrum of 2·DMP<sub>2</sub>.

### References:

- (S1) Z. Niu, F. Huang and H. W. Gibson, *J. Am. Chem. Soc.*, 2011, **133**, 2836-2839.  
(S2) B. L. Allwood, H. Shahriari-Zavareh, J. F. Stoddart, D. J. Williams, *Chem. Commun.* 1987, 1058-1061.
